# Supplementary material
Source: publisher figshare collection journal article supplement (https://gsajournals.figshare.com/ndownloader/files/31202134)
Supplement: Supplementary file 1 [file 31202134]

## Sheet: Sheet1
Data type	Experimental species	Symbol/name used in publication	Source – public	Source – published	Source – unpublished	Identifiers	New reagent	Comments
Data type (mandatory) Duplicate rows as needed. Order is flexible, but row titles must be preserved.	Experimental species (mandatory, "NA" okay)	Symbol/name used in publication (mandatory)	Source – public [stock center; company, data repository] (one of D,E,F mandatory)	Source -- published [PMID or 'this paper'] (one of D,E,F mandatory)	Source – unpublished [description, incl. lab of origin] (one of D,E,F mandatory)	Identifiers [format as ID_source:identifier] Separate multiple entries with semi-colon, space	New reagent (mandatory for new entities) Description, progenitor(s)	Comments (optional) Genotypes, purpose of reagent, additional information
strain, strain_background	Danio rerio	AB*	Washington University in St. Louis Fish Facility					Starting line for construct injections
strain, strain_background	Danio rerio	Tg(MiniCoopR;mitfa:mCherry), AB*		this paper		MC_WT	Injected MiniCoopR;mitfa:mCherry into AB*	Source of wild type melanocytes
strain, strain_background	Danio rerio	Tg(mitfa:BRAFV600E/+); p53+/lf; mitfa+/−; mitfa:mCherry		this paper		MC_Het	Crossed MC_WT x Tg(mitfa:BRAFV600E); p53lf/lf; mitfa−/−	Source of heterozygous melanocytes
strain, strain_background	Danio rerio	Tg(mitfa:BRAFV600E)/p53lf/lf/mitfa+/-/mitfa:mCherry		this paper		MC_Homo	Crossed MC_Het x Tg(mitfa:BRAFV600E); p53lf/lf; mitfa−/−	Source of homozygous melanocytes
strain, strain_background	Danio rerio	Tg(mitfa:BRAFV600E); p53lf/lf; crestin:EGFP		PMID: 26823433		MA		Source of melanoma cells
strain, strain_background	Danio rerio	Tg(mitfa:BRAFV600E); p53lf/lf; mitfa−/−		PMID: 21430779				Crossing
genetic reagent (in whole organism)	NA	MiniCoopR;mitfa:mCherry
commercial assay	NA	Machery Nagel Nucleospin XS kit	Fischer Scientific cat#NC0389511					RNA isolation
commercial assay	NA	Nextera DNA Sample Preparation kit	Illumina cat#FC-121-1030					DNA prep for ATAC-seq
commercial assay	NA	SPRI Ampure beads	Beckman Coulter cat#63880					Size selection for ATAC-seq prep
commercial assay	NA	Qubit DNA High Sensitivity assay	Thermo Fisher Q32851					Measure concentration of DNA during ATAC-seq prep
commercial assay	NA	Agilent High Sensitivity D5000 Screen Tape	Agilent cat#5067-5592					Agilent D5000 HS Screen Tape
commercial assay	NA	Agilent High Sensitivity D5000 Reagents	Agilent cat#5067-5593					Agilent D5000 HS Ladder and Sample Buffer
software, algorithm	NA	GSEA		PMID: 12808457, 16199517
software, algorithm	NA	FastQC	http://www.bioinformatics.babraham.ac.uk/projects/fastqc/
software, algorithm	NA	STAR		PMID: 23104886
software, algorithm	NA	RSEM		PMID: 21816040
software, algorithm	NA	DESeq		PMID: 20979621
software, algorithm	NA	ggplot2		Wickham H. 2016. Ggplot2: Elegant graphics for data analysis. Springer-Verlag New York.
software, algorithm	NA	pheatmap	https://CRANR-projectorg/package=pheatmap
software, algorithm	NA	CutAdapt		DOI: 10.14806/ej.17.1.200
software, algorithm	NA	Burrows-Wheeler Aligner		PMID: 19451168
software, algorithm	NA	samtools		PMID: 19505943
software, algorithm	NA	bamtools		PMID: 21493652
software, algorithm	NA	Genome Analysis Tool Kit		PMID: 20644199
software, algorithm	NA	BEDTools		PMID: 20110278
software, algorithm	NA	MACS2		PMID: 18798982
software, algorithm	NA	bedGraphtoBigWig		PMID: 20639541
software, algorithm	NA	ChIPQC		PMID: 24782889
software, algorithm	NA	idr		DOI: 10.1214/11-AOAS466
software, algorithm	NA	DiffBind	https://bioconductor.org/packages/release/bioc/html/DiffBind.html
software, algorithm	NA	HOMER		PMID: 20513432
large-scale dataset	Danio rerio	RNA-seq		this paper
large-scale dataset	Danio rerio	ATAC-seq		this paper
gene (source not applicable)			NA	NA	NA
strain, strain_background
genetic reagent (in whole organism)
cell line
transfected construct (in cell line)
antibody
recombinant DNA reagent
sequence-based reagent
peptide, recombinant protein
large-scale dataset
commercial assay	NA
chemical compound, drug	NA
software, algorithm	NA
other
